# Supplementary material for: Carboxylic-group-functionalized single-walled carbon nanohorns as peroxidase mimetics and their application to glucose detection
Source: Royal Society of Chemistry journal article supplement (doi:10.1039/c5an01104c), 2015-01-01
Supplement: c5an01104c1.pdf [file c5an01104c1.pdf]

## Electronic Supplementary Material

### Carboxylic-group-functionalized single-walled carbon nanohorns as peroxidase mimetics and their application to glucose detection

Shuyun Zhu<sup>a,b</sup>, Xian-en Zhao<sup>a</sup>, Jinmao You<sup>a</sup>, Guobao Xu<sup>b\*</sup>, and Hua Wang<sup>a\*</sup>

<sup>a</sup> Shandong Provincial Key Laboratory of Life-Organic Analysis, College of Chemistry and Chemical Engineering, Qufu Normal University, Qufu, Shandong, 273165, China.

<sup>b</sup> State Key Laboratory of Electroanalytical Chemistry, Changchun Institute of Applied Chemistry, University of Chinese Academy of Sciences, Changchun, Jilin, 130022, China.

\* To whom correspondence should be addressed. Tel/Fax: (+86)-431-85262747; E-mail: guobaoxu@ciac.ac.cn (G. Xu), hdhuawang@126.com (H. Wang).

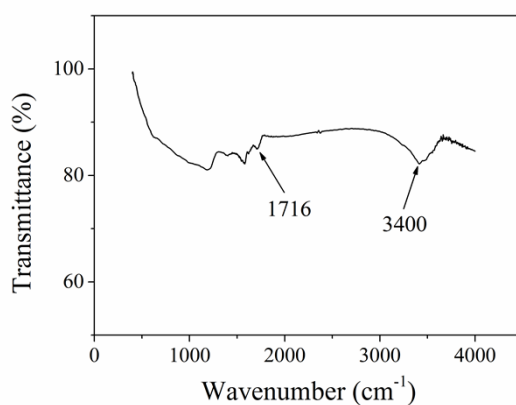

**Fig. S1** FTIR spectra of SWCNHs-COOH.

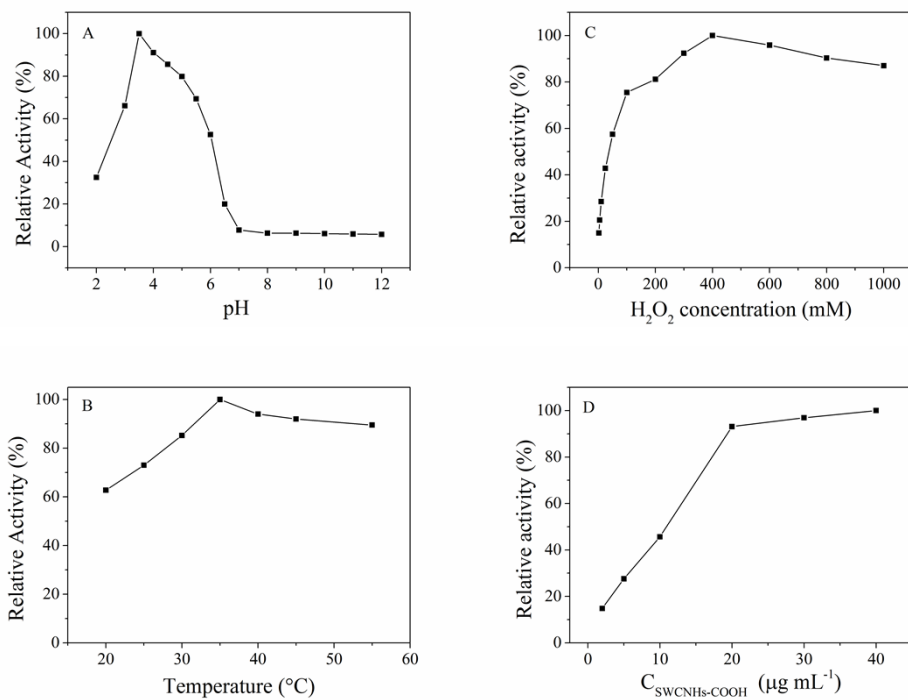

**Fig. S2** Dependence of the SWCNHs-COOH peroxidase-like activity on A) pH, B) temperature, C) H<sub>2</sub>O<sub>2</sub> concentrations, and D) SWCNHs-COOH concentrations. Experiments were carried out using 20 μg mL<sup>-1</sup> SWCNHs-COOH in 500 μL of 0.1 M phosphate buffer with 0.8 mM TMB as substrate. The concentration of H<sub>2</sub>O<sub>2</sub> was 100 mM at pH 3.5 and 35 °C unless otherwise stated. The maximum point in each curve was set as 100%.

**Table S1** Comparison of the apparent Michaelis-Menten constant ( $K_m$ ) and maximum reaction rate ( $V_{max}$ ) between SWCNHs-COOH and other enzyme mimics

| Catalyst                                             | Substrate                     | $K_m$ (mM) | $V_{max}$ ( $10^{-8} \text{ M S}^{-1}$ ) | Reference    |
|------------------------------------------------------|-------------------------------|------------|------------------------------------------|--------------|
| SWCNHs-COOH                                          | H <sub>2</sub> O <sub>2</sub> | 49.8       | 2.07                                     | Present work |
|                                                      | TMB                           | 0.506      | 2.28                                     |              |
| HRP                                                  | H <sub>2</sub> O <sub>2</sub> | 3.70       | 8.71                                     | 1            |
|                                                      | TMB                           | 0.434      | 10.0                                     |              |
| HCNTs                                                | H <sub>2</sub> O <sub>2</sub> | 0.02       | -                                        | 2            |
|                                                      | TMB                           | 41.42      | -                                        |              |
| C-Dots                                               | H <sub>2</sub> O <sub>2</sub> | 26.77      | 30.61                                    | 3            |
|                                                      | TMB                           | 0.039      | 3.61                                     |              |
| GO-COOH                                              | H <sub>2</sub> O <sub>2</sub> | 3.99       | 3.85                                     | 4            |
|                                                      | TMB                           | 0.0237     | 3.45                                     |              |
| C <sub>60</sub> [C(COOH) <sub>2</sub> ] <sub>2</sub> | H <sub>2</sub> O <sub>2</sub> | 24.58      | 4.011                                    | 5            |
|                                                      | TMB                           | 0.2333     | 3.473                                    |              |

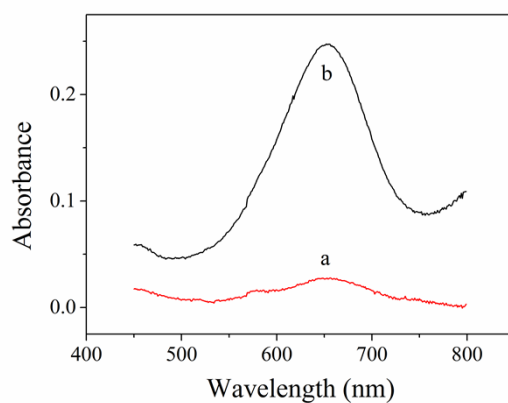

**Fig. S3** Typical absorption spectra of the colorimetric method by using GOx and SWCNHs-COOH catalyzed color reaction in the absence (a) and the presence (b) of 2 mM glucose.

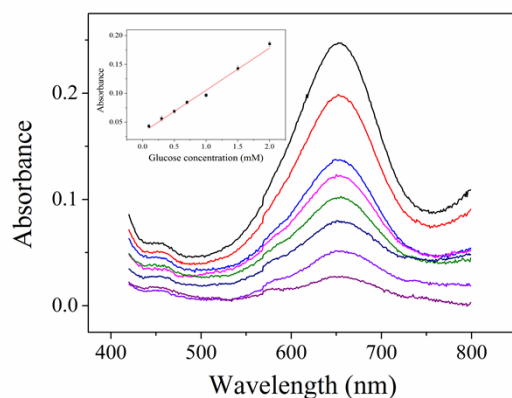

**Fig. S4** Typical absorption spectra of the colorimetric method by using GOx and SWCNHs-COOH catalyzed color reaction in the absence of 0, 0.1, 0.3, 0.5, 0.7, 1.0, 1.5, 2.0 mM glucose. Inset: the linear calibration plot for glucose determination. The error bars represent the standard deviation of the three measurements.

Table S2. Comparison of colorimetric methods based on enzyme mimics for glucose detection.

| Enzyme mimics                              | Linear range ( $\mu\text{M}$ ) | Detection limit ( $\mu\text{M}$ ) | Refs.        |
|--------------------------------------------|--------------------------------|-----------------------------------|--------------|
| SWCNHs-COOH                                | 100-2000                       | 100                               | Present work |
| HCNTs                                      | 0.5-115                        | 0.12                              | 2            |
| C-Dots                                     | 1-500                          | 0.4                               | 3            |
| GO-COOH                                    | 1-20                           | 1                                 | 4            |
| $\text{C}_{60}[\text{C}(\text{COOH})_2]_2$ | 1-40                           | 0.5                               | 5            |

## References

- [1] L. Gao, J. Zhuang, L. Nie, J. Zhang, Y. Zhang, N. Gu, T. Wang, J. Feng, D. Yang, S. Perrett and X. Yan, *Nat. Nanotechnol.*, 2007, **2**, 577-583.
- [2] R. J. Cui, Z. D. Han, J. J. Zhu, *Chem. Eur. J.*, 2011, **17**, 9377-9384.
- [3] W. B. Shi, Q. L. Wang, Y. J. Long, Z. L. Cheng, S. H. Chen, H. Z. Zheng, Y. M. Huang, *Chem. Commun.*, 2011, **47**, 6695-6697.
- [4] Y. J. Song, K. G. Qu, C. Zhao, J. S. Ren, X. G. Qu, *Adv. Mater.*, 2010, **22**, 2206-2210.
- [5] R. M. Li, M. M. Zhen, M. R. Guan, D. Q. Chen, G. Q. Zhang, J. C. Ge, P. Gong, C. R. Wang, C. Y. Shu, *Biosens. Bioelectron.*, 2013, **47**, 502-507.
